1 ***Temporal and interaction dynamics of dengue cases, entomological and***  
2 ***meteorological variables in Melaka, Malaysia: A multivariate time series***  
3 ***analysis.***

4  
5 Shazelin Alipitchay <sup>1¶\*</sup>, Muhammad Aswad Alias <sup>1,3¶</sup>, Sharifah Nur Shahirah Syed Abdul  
6 Hamid <sup>1&</sup>, Rabizah Hamzah <sup>1&</sup>, Norain Mansor <sup>1</sup>, Nurulhusna Ab. Hamid <sup>2</sup>, Hidayatulfathi  
7 Othman <sup>3</sup>.

8  
9 <sup>1</sup> Public Health Department, Melaka Health Department, Ministry of Health, Malaysia.

10 <sup>2</sup> Institute for Medical Research, Malaysia.

11 <sup>3</sup> Centre For Toxicology & Health Risk Studies (CORE), National University of Malaysia.

12  
13 \*Corresponding author:

14 [drlynn2002@gmail.com](mailto:drlynn2002@gmail.com) (SA)

15  
16 ¶ These authors contributed equally to this work.

17 & These authors also contributed equally to this work

18

19

20

21

22

23

24

25 **NOTE: This preprint reports new research that has not been certified by peer review and should not be used to guide clinical practice.**

## 26 **Abstract**

27

28 The interaction between dengue cases, entomological and meteorological variables has  
29 remained intricate for decades. Validated facts are important to form robust decision making  
30 with the adoption of safer and sustainable efforts. This study aims to elucidate the relationship  
31 between the variables in the long run and short-term dynamic focusing in Melaka, Malaysia,  
32 in an attempt to improve the understanding of the variables and their temporal associations.  
33 This study quantifies the variables on their temporal associations, potential time lags, and  
34 dynamic interplays between all the variable data sets. The research applies a Johansen  
35 Cointegration Test and Vector Error Correction Model to validate long term run and examine  
36 short-term deviations among dengue cases, temperature, ovitrap and sticky ovitrap data from  
37 2020-2022. Empirical findings prove that temperature, sticky ovitrap index (SOI) and ovitrap  
38 index (OI) has a significant and unique long-run equilibrium relationship with dengue cases.  
39 The short-term equilibrium results display a robust causality between variables. The model fit  
40 elucidates 74.2% of the dynamics. The VECM model provides an excellent trade-off between  
41 goodness of fit and complexity in describing the variables examined. Previous dengue  
42 occurrences predicted a surge of new dengue cases while preserving the cyclical pattern. The  
43 model predicts the utility and efficacy of sticky ovitraps. It also validates ovitrap use as a  
44 surveillance tool and offers substantiation of the influence of temperature on the progression  
45 of dengue cases.

46

47

48

49

50

## 51 *Introduction*

52 According to the World Health Organization, dengue fever is currently regarded as the most  
53 critical mosquito-borne viral disease worldwide. Furthermore, it is the most rapidly spreading,  
54 with a 30-fold surge in worldwide occurrence within the last five decades. The Western Pacific  
55 and Southeast Asia regions collectively represent 75% of the worldwide dengue illness burden  
56 [1]. The relationship among Dengue virus (Den V), Aedes mosquitoes, humans as the principal  
57 host, and the environment is intricate. Due to the absence of viable therapies and vaccinations,  
58 disease surveillance and vector control populations remain the primary components of the  
59 current dengue prevention program [2]. A new paradigm has been proposed, focusing on rapid,  
60 sensitive, and intensive control methods that incorporate intensive vector surveillance to curb  
61 and reduce the Aedes population [3]. In order to establish a more refined and practical strategic  
62 control method, it is essential to comprehend and investigate the critical variables—host,  
63 environment, and entomological relations—in order to facilitate more expeditious and robust  
64 decision-making.

65 Evidence on the dynamic interaction of these variables is still insufficient worldwide.  
66 Many studies use correlation and comparison analysis, which leads to inconclusive findings  
67 and insufficiently informed decision-making. To fully understand the underlying trends or  
68 systemic patterns over time, it is essential to use time series analysis between the three main  
69 variables. This will enable us to examine the relationships between each variable, draw  
70 conclusions, and propose necessary changes that should be made to control and prevent dengue.  
71 It is important to note that time-series analysis isn't just about predicting the future; instead, it's  
72 about understanding the past. Studies that utilize entomological data to forecast dengue cases  
73 are still scarce [4,5] and provide insufficient insight and conclusion. The entomological studies  
74 measure the infestation level of aedes using a proximal variable such as number of larvae. The

75 studies are unable to provide sufficient data to explain the dynamic interaction and accurately  
76 forecast the model. The reasons may be based on the multifaceted dynamics and interactions  
77 of disease transmission, which involve complex aedes behavioural and bionomics, as well as  
78 the disease manifestation within the host system.

79         The effects of meteorological variables on dengue cases are yet to be explored  
80 globally with the use of time series. Only in recent times have studies begun to investigate the  
81 influence of climatic conditions on the occurrence of dengue cases. A study in Malaysia used  
82 a multilinear regression analysis to investigate the relationship between meteorological  
83 variables and dengue cases. The findings showed a positive correlation between rainfall and  
84 temperature with weekly dengue cases [6]. Additionally, the study looked at the strongest  
85 correlation between the ground-based stations and the satellite-based Earth. It found that  
86 temperature, followed by rainfall and wind speed, is a useful meteorological variable for  
87 predicting dengue in future studies. A study conducted in India utilised different regression  
88 model to determine the impact of meteorological parameters on dengue occurrences. The  
89 results revealed that humidity and mean maximum temperature are the primary factors  
90 influencing dengue incidences, with significant positive and negative associations respectively  
91 [7]. Relative humidity was found to be the most accurate indicator of increasing dengue cases  
92 in a study in Bangkok [8].

93         Two experimental studies on dengue cases were conducted in Malaysia to create a  
94 forecasting model by analyzing environmental, entomological, and epidemiological data series.  
95 Both studies highlighted the forecasting element. The first study showed only two significant  
96 variable data sets: the relation between entomological and environmental variables with the use  
97 of the autoregressive distributed lag (ADL) model [9]. The ovitraps data was used as the  
98 entomological variable. The previous week's rainfall played a significant role in increasing the  
99 mosquito population, followed by maximum humidity and temperature. The second study was

100 implemented in dengue-prone areas with the use of ovitraps and several mobile weather  
101 stations comprising rain gauges, temperature, and humidity data loggers located in the areas  
102 [10]. This is a follow-up study to address the confounding factors and improve forecast accuracy.  
103 Significant findings were established among the three variables, with a forecasting accuracy of  
104 85% for the specific area. Another study with the use of data from the two previous studies  
105 mentioned, proposed the installation of mobile rain gauges inside each dengue risk area to be  
106 integrated into the early warning system in order to generate a more precise prediction data  
107 [11]. This current study incorporates three variables: epidemiological, entomological, and  
108 meteorological data (temperature). Two sets of serial entomological data are being analyzed to  
109 measure the aedes infestation level: ovitraps and sticky traps. This research attempts to  
110 elucidate the relationship between the variables in the long run and short term with the use of  
111 multivariate time series analysis. From this multivariate time series analysis, this study hopes  
112 to achieve and quantify the variables on their temporal associations, potential time lags, and  
113 dynamic interplays between all the variable data sets. It can offer insights into the cointegration  
114 of all variables, improve the understanding of the variables that have impact on the incidence  
115 of dengue cases, and guide specific targeted interventions and control measures in the area.  
116 The temperature variable was selected as it has an excellent correlation between the ground-  
117 based stations and equivalent satellite-based Earth Observation (EO) data, making it an  
118 outstanding estimator of meteorological variables.

## 119 ***Materials and methods***

### 120 ***Study area***

121 This study is in Melaka Tengah, a high-density population with 1,673 people per square  
122 kilometer. The state consists of three districts: Melaka Tengah, Alor Gajah, and Jasin. The land  
123 covers an area of 1664 km<sup>2</sup>. It has a population of 985700 people. The state is situated in the

124 southern part of Peninsular Malaysia. As of July 7, 2008, Malacca City, the capital of the state,  
125 has been recognized as a UNESCO World Heritage Site, attracting numerous tourists from  
126 around the globe. The city experiences an equatorial climate with high temperatures and  
127 humidity all year round. It receives heavy rainfall, especially between September and  
128 November. In the past five years, daytime temperatures have ranged from 31 to 33 °C (88 to  
129 91 °F), while nighttime temperatures have averaged around 23 °C (73 °F).

### 130 ***Epidemiological data***

131 Melaka recorded a total of 2843 dengue cases in 2020 with an incidence rate of 295 per 100,000  
132 population, 611 dengue cases in 2021 with an incidence rate of 62.8 per 100,000 population,  
133 followed by a total of 665 dengue cases in 2022 with an incidence rate of 67 per 100,000  
134 population [12]. Melaka Tengah accounted for the majority of reported dengue cases (70%).  
135 In Malaysia, dengue cases are reported as soon as a diagnosis is made and entered into an  
136 electronic notification web-based system. This system is then directly linked to a second web-  
137 based system called e-Dengue, which records all the profiles and locations of dengue cases. e-  
138 Dengue consists of data that has been validated epidemiologically and geocoded. The system  
139 also records control activity information. Thus, it is specifically designed to generate official  
140 daily report instantly. The data set on dengue cases included all registered cases that occurred  
141 between epidemiological week 1, 2020, and epidemiological week 52, 2022, spanning a total  
142 of 157 consecutive weeks.

### 143 ***Entomological data***

144 Two types of Aedes traps were employed: the conventional ovitrap and the autocidal trap. They  
145 have been used as a standard entomological tool to survey the mosquito population. An ovitrap  
146 is a cylindrical plastic container with opaque black sides, which has a diameter of 7 cm and a

147 height of 9 cm. A hardboard oviposition paddle of 10 cm × 3.0 cm × 2.5 cm is inserted into  
148 each ovitrap, with the rough surface facing upwards. The ovitrap was filled with tap water up  
149 to a height of 5.5 cm. A total of 60 ovitraps were installed within premises, semi-indoor, and  
150 outdoor. They are placed on weekly basis at Station 1, located in Batu Berendam ecosystem, a  
151 public residential area. These containers were positioned there subsequent to acquiring consent  
152 from the homeowner.

153           The second trap, known as the sticky trap or MyMAT (Malaysian Mosquito Autocidal  
154 Trap), is comprised of a 700-ml black plastic cylinder container. It is filled with approximately  
155 600 ml of dechlorinated water and BTI (Bacillus thuringiensis) larvicide. An adhesive plastic  
156 strip, commonly known as a sticky card, was inserted into the container to capture the gravid  
157 adult mosquito during oviposition. The dechlorinated water, together with BTI and sticky  
158 cards, were replaced every two weeks. Then, the adult mosquitoes were extracted from the  
159 adhesive card using forceps, then identified using a 20X magnifying glass. The relevant data  
160 was subsequently recorded in the field during the trap inspections. A total of 200 sticky traps  
161 were strategically positioned similarly to ovitraps and were deployed at Station 2 within the  
162 Sungai Udang ecosystem, which is another public residential area. Both the ovitrap index and  
163 the sticky trap index can serve as estimators for the size of the Aedes population, the size of  
164 the larvae, and the size of the adults, respectively [13-15]. Sticky traps that capture adult female  
165 Aedes mosquitoes provide valuable insights into the likelihood of dengue transmission during  
166 an ongoing outbreak.

### 167 ***Meteorological data***

168 Temperature data set from 2020 up to 2022 was retrieved from Meteorological Department.

### 169 ***Data processing***

170 R software 3.2.0 version is used to analyzed the time series data. The dataset comprises records  
171 of dengue cases (onset), ovitrap index, sticky trap index, and temperature observations  
172 spanning from 2020 to 2022. Each of the four data sets was graphed on its own panel, with a  
173 shared horizontal axis representing time in serial biweekly intervals.

## 174 ***Data process flow***

### 175 ***Stationarity testing and optimal lag estimation.***

176 The Augmented Dickey-Fuller test was employed to assess the stationarity of each dataset and  
177 time series. The null hypothesis, that a unit root is present, would be rejected for a series if its  
178 p-value fell below the chosen significance level of 5%, indicating stationarity. The non-  
179 stationary series were made stationary by differencing the series and tested for stationarity until  
180 they achieved stationarity. It entails the need to use a specific model, ensuring that subsequent  
181 analysis yields valid and reliable results for forecasting or understanding the dynamics between  
182 these variables. The optimal lag was selected based on the Akaike information criterion, AIC  
183 [16]. A p-1 lag was applied in estimation, referring to the lag order of the error correction term.  
184 VECM affords flexibility in terms of identifying both short-term dynamics and long-run  
185 equilibrium relationships between integrated variables. Careful attention to stationarity testing  
186 and cointegration analysis can thus help ensure the appropriateness and meaningfulness of any  
187 econometric models employed and conclusions drawn.

### 188 ***Cointegration testing.***

189 The cointegration of the variables was assessed using the Johansen cointegration test of the  
190 eigenvalue approach. The test is to detect multiple cointegration time series and is appropriate  
191 for multivariate analysis time series [17]. The null hypothesis of rank = 0 means that there is  
192 no cointegration at all.



### 193 ***Model estimation.***

194 The estimation of the model used and selected is done by looking into a series of cointegrations.  
195 If the series are not cointegrated, we can estimate the model via the vector autoregressive  
196 (VAR) function. If the series are cointegrated, the Vector Error Correction Model (VECM) is  
197 considered. This differs from the vector autoregressive (VAR) model in terms of the error  
198 correction term. VECM is a multivariate time series analysis that will compute the effect of  
199 how the growth rate of a variable changes if one of the variables departs from its equilibrium  
200 value. Hence, it allows both short-run and long-run coefficients, providing insights into  
201 equilibrium relationships and deviations from that equilibrium. VECM is able to capture the  
202 causal effect and determine the short- and long-term runs. Therefore, it is plausible and relevant  
203 in explaining the case-occurrence pathway.

### 204 ***Forecasting evaluation.***

205 Forecasting model based on VECM was captured with the use of comparative analysis to assess  
206 the forecasted biweekly onset values compared against biweekly average actual values. It is  
207 observed over a 12-week period, commencing from January 2023 until March 2023. Three  
208 primary statistical metrics, Mean Squared Error (MSE), Root Mean Square Error (RMSE) and  
209 Mean Absolute Percentage Error (MAPE) were employed to quantify the deviations between  
210 the VECM forecasts from the actual observed values.

## 211 ***Results***

### 212 ***Time plot data series***

213 The time series analysis of four distinct variables is depicted in the diagram (Figure 1): case  
214 counts (dengue onsets), temperature (tem), ovitrap index (oi), and sticky ovitrap index (soi). A

215 common horizontal axis that represents time is shared by each variable, which is plotted in a  
216 distinct panel. The time plot is translated into biweekly serial data, resulting in 78 observations.  
217 **Figure 1.** Four distinct panel of line graphs with case counts (dengue onsets), temperature  
218 (tem), ovitrap index (oi), and sticky ovitrap index (soi) readings on y -axis plotted against time  
219 in week from 0 up to 80 weeks (year from 2020 till 2022) on x axis, extracted from R.

220

221 The case count exhibits significant fluctuation in the early stages but becomes rather  
222 consistent in later periods. In 2020, the number of dengue cases reached its greatest level of  
223 1948 cases, with an incidence rate of 332.1 per 100,000 people. In comparison, there were 478  
224 cases with an incidence rate of 80.4 in 2021, and 444 cases with an incidence rate of 73.8 in  
225 2022. The temperature shows some fluctuation with no clear seasonal pattern discernible from  
226 this graph with minimum average temp of 28.7°C up to maximum average temperature of  
227 33.4°C. The ovitrap index exhibits prominent deviations with peaks and troughs, while the  
228 sticky ovitrap index for adult mosquitoes demonstrates significant volatility with occasional  
229 spikes, potentially suggesting sudden increases in mosquito populations at specific intervals.

230 The number of cases varies in the beginning but reach to a fairly stable level later.  
231 With 1948 cases, the number of dengue cases peaked in 2020, with an incidence rate of 332.1  
232 per 100,000. In contrast, the incidence rate of 478 cases in 2021 was 80.4, while the incidence  
233 rate of 444 cases in 2022 was 73.8. This graph also indicates that there is no obvious seasonal  
234 pattern in the temperature data series, with a minimum average temperature of 28.7°C and a  
235 maximum average temperature of 33.4°C. The sticky ovitrap index for adult mosquitoes shows  
236 considerable volatility with sporadic spikes, which may indicate abrupt increases in mosquito  
237 populations at particular periods. The ovitrap index shows notable deviations with peaks and  
238 troughs.

## 239 *Augmented Dickey Fuller, ADF unit root testing*

240 The Augmented Dickey-Fuller (ADF) test successfully identified the existence of three non-  
241 stationarity data series, which were then transformed into stationary series using first  
242 difference. Guided by AIC, a lag length of 10 was determined to be optimal, providing a  
243 balance between model complexity and model fitting. This lag order is used for estimating  
244 Johansen cointegration and VECM tests.

245

## 246 *Cointegration Analysis*

### 247 *Cointegration trace test statistics*

248 A 10-lag vector autoregression model was utilized to conduct the Johansen cointegration trace  
249 test on the variables. The findings show that there is one cointegrating equation with a  
250 significant level, indicating a long-term equilibrium relationship between the variables. Table  
251 1 presents the eigenvalues and trace test statistics for four hypotheses. These hypotheses  
252 involve ranks of  $\leq 3$ ,  $\leq 2$ ,  $\leq 1$ , and  $= 0$ . The greatest value obtained from these tests is 0.477. The  
253 following column displays the trace test statistics alongside crucial values corresponding to  
254 specific confidence levels: 10%, 5%, and 1%. Applying the conventional method of using a  
255 5% critical value, with 'r' denoting the rank and 'r = 0', the test statistics of 78.2 is greater than  
256 53.1. Subsequently, null hypotheses that propose 'r > 0', which implies the existence of  
257 cointegration was rejected. When the value of r is less than or equal to 1, the test statistics of  
258 33.44 is less than 34.9, the null hypotheses was not rejected. Ultimately, there is at most one  
259 cointegration relationship that exists at a significant level, elucidating a long-term state of  
260 balance among the variables.

261

262 **Table 1.** Johansen Cointegration Test Results

263

|               |                   |                   | <b>10%</b>      | <b>5%</b>       | <b>1%</b>       |
|---------------|-------------------|-------------------|-----------------|-----------------|-----------------|
|               |                   | <b>Trace</b>      | <b>Critical</b> | <b>Critical</b> | <b>Critical</b> |
| <b>Rank,r</b> | <b>Eigenvalue</b> | <b>statistics</b> | <b>value</b>    | <b>value</b>    | <b>value</b>    |
| r=0           | 0.477             | 78.21             | 49.65           | 53.12           | 60.16           |
| r≤1           | 0.208             | 33.44             | 32              | 34.91           | 41.07           |
| r≤2           | 0.141             | 17.37             | 17.85           | 19.96           | 24.6            |
| r≤3           | 0.095             | 6.86              | 7.52            | 9.24            | 12.97           |

264 Note: The rank of the matrix A, is given by r and the Johansen test sequentially tests whether this rank r is equal  
 265 to zero, equal to one, through to  $r = n - 1$ , where n is the number of time series under test. Eigenvectors and  
 266 eigenvalues are fundamental concepts in linear algebra. The basic equation is  $Ax = \lambda x$ . The number  $\lambda$  is an  
 267 eigenvalue of A. The eigenvalue  $\lambda$  tells whether the special vector x is stretched or shrunk or reversed or left  
 268 unchanged—when it is multiplied by A. The results include trace statistics and maximum eigenvalue statistics to  
 269 determine the number of cointegrating relationships.

270

271 ***Cointegration Vector***

272 This vector equation describes the long-term relationship between variables through the  
 273 process of cointegration of time series. The procedure of normalising each vector equation in  
 274 Table 2 reveals the major dynamic relationship of cointegration. Over the long term, there is  
 275 an inverse interaction between temperature and the sticky ovitrap index (SOI) with dengue  
 276 cases, as compared to the ovitrap index (OI). This informative equilibrium provides us with the  
 277 information that; persistence increment of temperature leads to decreases in dengue cases. The  
 278 consistent and efficient sticky ovitraps, which capture adult mosquitoes over a lengthy period  
 279 of time, have resulted in a decrease in dengue incidence. A consistently positive correlation  
 280 between the coefficient of OI and dengue cases validates that OI can effectively serve as a  
 281 reliable estimate of the aedes population in areas with a high burden of dengue.

282 **Table 2.** Cointegrating Vector Equilibrium

| 283 | Variable        | Coefficient |
|-----|-----------------|-------------|
| 284 | CASE            | 1.0000      |
| 285 | TEMPERATURE     | 0.9507      |
| 286 | OVITRAP, OI     | 0.9566      |
| 287 | S. OVITRAP, SOI | 1.3755      |
| 288 |                 |             |

289

### 290 ***VECM Estimation***

291 When cointegration data series are present, the VECM model is used to calculate and include  
292 error correction terms that take into account any deviations from the long-term equilibrium.  
293 This model is well-suited for examining the short-term interactions between variables. A lag  
294 of p - 1 was included to adjust for the degrees of freedom used by the lag inclusion. Here is the  
295 VECM equation for this analysis:

$$296 \Delta CASE_t = \lambda + \theta \times ECT_{t-9} + \delta_1 \Delta TEMPERATURE_{t-9} + \delta_2 \Delta OI_{t-9} + \delta_3 \Delta SOI_{t-9} + \epsilon_t$$

- 297 •  $\Delta$  denotes the first difference of a variable.
- 298 •  $ECT_{t-9}$  (Error Correction Term) is the lagged value of the deviation from the  
299 long-term equilibrium (residuals from the cointegration equation), included to  
300 bring the variables back towards equilibrium.
- 301 •  $\gamma, \theta, \delta_1, \delta_2, \delta_3$  are parameters to be estimated.



327 i. The positive coefficients of sticky ovitrap index, SOI, in the sticky ovitrap equation at lags  
328 -6 and -8 demonstrated the sustained effectiveness of sticky traps. This indicates the crucial  
329 use of these tools as part of strategy in persistently high populations of the Aedes mosquito.  
330 This discovery suggests that the current existence of adult Aedes mosquitoes will have a  
331 substantial impact on the population's growth after 6 and 8 biweekly intervals, corresponding  
332 to 3 and 4 months, respectively. However, at a lag of -1 (a gap of 14 days) and a negative  
333 coefficient, a low current capture measurement of SOI is associated with a past high SOI  
334 reading. This explains the ecological dynamics of Aedes mosquitoes and their life cycle, which  
335 includes the duration of the incubation period of the dengue virus. The dengue virus undergoes  
336 an incubation period of around 7 to 10 days inside the mosquito following its ingestion of blood  
337 from an infected individual. This explains that the particular phase of the life cycle is very  
338 much related to temporal fluctuations of the mosquito population and the impact on the  
339 utilization of sticky ovitraps within the ecological system.

340 ii. The case equation shows significant positive coefficients at case lag -3, lag -7 and lag -8. It  
341 implies that preceding dengue cases have a continuing impact on future incidences. This allows  
342 us to understand that the transmission of dengue follows a cyclical pattern in the long term.  
343 Additionally, it is affected by previous outbreaks, which cause deviations or fluctuations from  
344 a stable state. Consequently, this results in peaks in dengue cases or epidemics.

345 iii. In the case equation, in relation to SO variable at lag-3 and -4, conversely significant  
346 negative coefficients reveal that effective aedes control underscoring the effectiveness of these  
347 tool as interventions over time.

348 iv. The ovitrap equation in relation to ovitrap variables at lag-1, -3, and -4 produces negative  
349 coefficients, suggesting that a persistent increase in aedes larvae leads to a subsequent decline  
350 of the population in a time frame of two weeks up to two months. It indicates that there's a

351 rapid (brief period of time) external influence resulting in the decline of Aedes larvae. This  
 352 might as well be the result of prompt control measure or interplay of other factors (latency -1,  
 353 -3, -4). Nevertheless, the population of larvae will ultimately increase as a result of the inability  
 354 to maintain control measures or other interactions that arise within the ecological system at lag-  
 355 9, or 4.5 months later.

356 v. The significant negative coefficient of temperature at lag-6 for *case equation*, shows the  
 357 interplay of persistent increasing of temperature in the ecological link led to decline of dengue  
 358 cases subsequently.

359 vi. In the equation for the sticky ovitrap, the lag-1 case variable has a positive coefficient.  
 360 Within a 14-day period, an increase in adult aedes mosquito populations will result in the  
 361 transmission of dengue fever and the development of cases.

362

363 **Table 3.** Significant Coefficients in VECM Analysis

| Coefficient |               |                  |              |
|-------------|---------------|------------------|--------------|
| Equation    | Variable      | (Standard Error) | Significance |
| CASE        | ECT           | -0.2584 (0.0654) | ***          |
| S. OVITRAP  | S. OVITRAP -1 | -0.7130 (0.1973) | **           |
| CASE        | CASE -3       | 0.3583 (0.1240)  | **           |
| CASE        | S. OVITRAP -3 | -1.1640 (0.3870) | **           |
| CASE        | S. OVITRAP -4 | -1.4545 (0.4025) | **           |



|     |            |                |                  |    |
|-----|------------|----------------|------------------|----|
| 364 | OVITRAP    | OVITRAP -4     | -0.6374 (0.2311) | ** |
| 365 | CASE       | TEMPERATURE -6 | -7.5107 (2.4192) | ** |
|     | CASE       | CASE -7        | 0.4167 (0.1476)  | ** |
|     | CASE       | CASE -8        | 0.4106 (0.1317)  | ** |
|     | S. OVITRAP | CASE -1        | 0.1930 (0.0799)  | *  |
|     | OVITRAP    | OVITRAP -1     | -0.4359 (0.1837) | *  |
|     | OVITRAP    | OVITRAP -3     | -0.5241 (0.2125) | *  |
|     | S. OVITRAP | S. OVITRAP -6  | 0.1715 (0.0752)  | *  |
|     | S. OVITRAP | S. OVITRAP -8  | 2.8847 (1.4001)  | *  |
|     | OVITRAP    | OVITRAP -9     | 0.5341 (0.2371)  | *  |

---

366 *Significance levels are denoted as \*\*\* ( $p < .001$ ), \*\* ( $p < .01$ ), and \* ( $p < .05$ ).*

367

### 368 ***Forecasting based on VECM***

369 In the evaluation of the Vector Error Correction Model (VECM) for forecasting purposes, the  
 370 forecasted biweekly onset values were meticulously compared against the biweekly average  
 371 actual values observed over a 12-week period, commencing from January 2023 until March  
 372 2023 (Figure 2). This comparative analysis aimed to assess the model's predictive accuracy  
 373 (Table 5) and reliability in estimating real-world occurrences within the specified timeframe.

374 The two main statistical metrics used to measure the differences between the VECM  
 375 predictions and the actual observed values were the mean squared error (MSE) and the root  
 376 mean square error (RMSE). The mean squared error (MSE) between the actual and predicted

377 values is 176.42, which indicates the variance in forecast accuracy. While the RMSE, computed  
378 as 13.28 is directly relates to the average error magnitude. Additionally, a third metric known  
379 as the mean absolute percentage error (MAPE), was determined to be 2.72%. This sums a much  
380 clearer and easily interpretable indication in percentage terms. This metric is useful in  
381 delivering the relative accuracy of the forecasts, allowing stakeholders to look into the potential  
382 impact of forecast errors in operational terms [18,19].

383

384 **Table 5.** Statistical metric values

|     | <b>Metric</b> | <b>Value</b> |
|-----|---------------|--------------|
| 385 |               |              |
| 386 | MSE           | 176.2        |
| 387 | RMSE          | 13.28        |
| 388 | MAPE          | 2.72%        |
| 389 |               |              |

390 **Figure 2.** Actual case count line graph from January 2020 to March 2023 and predicted case  
391 count line graph of dengue case plotted from January 2023 to March 2023, extracted from R.  
392 The model is tested for this particular period of time, spanning from January to March of 2023.  
393 It matters for several reasons. First off, the study period was elongated to investigate a wider  
394 range of environmental and potentially epidemiological dynamics relevant to the topic of the  
395 research. These interplays included temperature deviations, vector populations as expressed by  
396 the ovitrap index (OI), and the sticky ovitrap index (SOI). It captures their effects on dengue  
397 fever incidences. Second, by examining model performance under different settings, data from  
398 this particular timeframe may be analyzed. This can reveal information on the adaptability and  
399 sensitivity of the VECM to temporal changes in the underlying variables.

## 400 ***Discussion***

401 This VECM method is distinct in its ability to establish both the long-term and short-term  
402 deviations of variables, including those related to epidemiology, entomology, and meteorology  
403 within an ecological context. It is a multivariate regression time series analysis that reduces  
404 confounding factors, demonstrates variable cointegration, captures the causal effect either  
405 directly or inversely, and can be utilized for further forecasting. Knowledge of all the variables  
406 studied is essential to estimating the best fit and yet being able to elucidate the complexity at  
407 the same point. These findings are instrumental for the field workers, public health officials  
408 and policymakers, emphasizing the need for historical data consideration and continuous  
409 analysis and the implementation of timely, sustained interventions to manage and mitigate  
410 dengue effectively. The key findings are further described;

### 411 ***Temperature***

412 This study showed that the continued rise in temperatures results in a decline in the number of  
413 dengue cases over an extended period of time. Additionally, it recorded a temporary  
414 divergence, referring to a variation in temperature from its stable state that will influence  
415 dengue instances three months later. Nevertheless, the temperature has shown a zero-lag  
416 association with sticky ovitrap and ovitrap index. The dynamic of the interaction between  
417 temperature and dengue cases can be attributed to the ecological system, namely the  
418 complicated impact of temperature on vector transmission to humans.

### 419 ***Temperature effect on biological characteristics of aedes.***

420 Mosquitoes are poikilothermic organisms, meaning that variations in the ambient temperature  
421 have an immediate impact on their internal body temperature. Although warmer temperatures  
422 can initially facilitate mosquito breeding and virus transmission, they can also result in long-

423 term ecological adaptations that help control mosquito populations. These adaptations may  
424 include greater predator activity or faster virus incubation, which can lead to early viral die-  
425 offs [20]. The ideal temperature range for their growth and progress is between 25 and 30  
426 degrees Celsius. As the ambient temperature increases, there is a proportional increase in the  
427 activity of *Aedes* mosquitoes [21]. Studies have demonstrated that *Aedes albopictus* displayed  
428 the shortest gonotrophic cycle at a temperature of 30 °C, which is within a duration of 3.5 days  
429 [22]. Carrington et al. observed that the duration of the gonotrophic cycle in *Aedes aegypti*  
430 decreased as the average temperature increased [23]. Thus, evidence has shown that  
431 temperatures greater than the ideal range can result in a decrease in lifespan and deter immature  
432 stages development. This will result in a significant reduction in the number of eggs produced,  
433 which leads to a decrease in the size of the population [24-26].

#### 434 ***Temperature effect on vector competence***

435 Vector competence refers to the ability of mosquitoes to contract infections and then transmit  
436 those infections to other hosts. The mechanism remains incompletely comprehended.  
437 Generally, *Ae. albopictus* exhibits lesser vector competence compared to *Ae. aegypti*. The  
438 transmission of the dengue virus (DENV) was enhanced as the temperature climbed within the  
439 range of 18°C to 32°C. Nevertheless, the transmission of the virus is diminished when the  
440 temperature exceeds 32 °C, resulting in a decrease in its ability to be transmitted by its carrier  
441 [27,28]. This is intimately related to immune system pathways and tissue barriers in the  
442 mosquito, which lower the rate of midgut infections and DEN V transmission [29].

#### 443 ***Temperature effect on Den Virus, DEN V.***

444 DEN V is a single-positive-stranded RNA virus that encodes three structural proteins and seven  
445 non-structural proteins. The structural proteins consist of the capsid (C), membrane (M), and  
446 envelope (E) proteins. The temperature-induced structural alterations usually occur between

447 31°C and 35°C and are irreversible, weakening the E protein [30,31]. Hence, it diminishes viral  
448 infectivity. Therefore, it is imperative to thoroughly examine the impact of global warming on  
449 the survival of Aedes mosquitoes. This will certainly interfere with the transmission of dengue  
450 fever. The impact on warmer climate regions results in being closer to the thermal thresholds  
451 that many different kinds of species have. It is also necessary to consider the impact on cooler  
452 regions, which encourages the spread of vector borne illnesses [32]. Consequently, the burden  
453 and rate of transmission of vector borne diseases are significantly impacted by this  
454 modification. Therefore, it is essential to closely monitor this climate change signal and how it  
455 affects the adaptability of the vector.

### 456 ***Sticky Ovitrap***

457 In the context of epidemics, the conventional approach of employing insecticides to manage  
458 adult female aedes mosquitoes has been replaced by a new approach that focuses on the  
459 creation and evaluation of non-insecticidal methods. Moreover, the increasing apprehension  
460 regarding the development of pesticide resistance and its adverse effects on the environment  
461 and human health is a significant catalyst for the adoption of safer and more sustainable  
462 technologies. The sticky ovitrap has become increasingly significant in the monitoring and  
463 management of mosquitoes in recent years [33,34]. It offers a quicker and more direct  
464 assessment of the efficacy of ovipositional attractants, while also catching the carrier of  
465 circulating Den V. There is a scarcity of research on the use of time series or regression analysis  
466 to the use of sticky ovitraps. The findings of this study demonstrate that consistent deployment  
467 of sticky ovitraps in an area with a high prevalence of dengue fever has proven to have a direct  
468 impact on the development of dengue cases. It showcased its utility and efficacy as a  
469 component of a control approach.

470 The short-term sticky ovitrap equation, coupled with the sticky ovitrap variable,  
471 illustrates the interplay between the bionomics and life cycle of Aedes at lag 1. Furthermore, it  
472 indicates that the ongoing existence of adult aedes mosquitoes will dictate the population's  
473 capacity to thrive approximately 3 to 4 months later. Thus, incorporating it into the control plan  
474 in areas with consistently high dengue cases or outbreaks proved to be an invaluable tool. The  
475 intervention tool becomes significantly more successful over time, namely at 1.5 and 2 months  
476 later. However, when considering a short time period (specifically, a lag-1 or 14-day interval),  
477 the interaction between the sticky ovitrap equation and the case variable showed that the tool  
478 acts primarily as a surveillance tool rather than a control tool. This suggests that there is a  
479 possibility for the rapid and continuous transmission of the dengue virus to result in the  
480 occurrence of new cases. Therefore, in an area where there is a significant presence of adult  
481 aedes mosquitoes, it is crucial to implement prompt and intensive control methods in  
482 conjunction with the use of sticky traps. It also implies subsequent measures or evaluations in  
483 the area affected by dengue is crucial after implementing an initial control intervention or first  
484 control cycle.

485 Recent studies have demonstrated encouraging effectiveness in utilizing mass trapping  
486 of lethal ovitraps to control the aedes population. Nevertheless, the level of certainty regarding  
487 these findings is only moderate. Several key elements are missing, such as the study design,  
488 the operationalization, the standard index used, and the analysis of the data, including the  
489 outcome or epidemiological endpoint [33]. The outcomes of this model's dynamic analysis will  
490 unequivocally demonstrate the efficacy of lethal ovitrap intervention in complementing  
491 measures to mitigate dengue cases.

492 Two types of Aedes adult traps can be deployed depending on the physiological stage  
493 of the targeted Aedes mosquitoes: (i) host-seeking female traps and (ii) lethal ovitrap gravid  
494 females. Many countries have used these traps as part of trial interventions [34]. To achieve a

495 significant reduction in mosquito populations and viral transmission, it is important to study  
496 the protocols for operational deployment circumstances in order to identify the best deployment  
497 parameters under various epidemiological scenarios. It is imperative to take into account the  
498 guidelines of the World Health Organization and adapt them to the specific operational  
499 conditions of the control team [35]. The extensive utilization of deadly ovitraps as a component  
500 of the dengue control strategy provides substantial support for the 3rd and 11th Sustainable  
501 Development Goals (SDGs). Addressing a logistical and financial investment setback in the  
502 trap's deployment is crucial. In conjunction with that, cost-effectiveness and cost-benefit  
503 should be carried out as part of an economic evaluation measure.

#### 504 ***Ovitraps***

505 The long-term equilibrium indicates that the ovitraps tool can be used as a reliable predictor of  
506 dengue cases in an area with a significant dengue burden. Consistently high current OI readings  
507 in an area will determine the persistence of the larval population between four and five months  
508 later. This marker can certainly serve as an invaluable tool to help in informed decision-making  
509 for public health officers and stakeholders. This decision consists of either continuing with the  
510 use of ovitraps as a monitoring tool that can trigger appropriate control measures or using it as  
511 a marker for exit strategy after a certain time frame prior to relocating the tool to another site.  
512 A recent forecasting study conducted in Brazil, employing a different analytical model,  
513 corroborates this claim by indicating that the utilization of ovitraps has the potential to identify  
514 dengue epidemics with a lead time of four to six weeks [36].

#### 515 ***Dengue case***

516 This analysis expressed the temporal pattern of dengue transmission, which is persistent and  
517 cyclical in nature while, concurrently, in the short term, being influenced by past outbreaks,  
518 giving rise to deviations from equilibrium, thus resulting in peaks of dengue cases or epidemics.

519 Hence, this research offers a valid agreement for the execution of a successful dengue epidemic  
520 plan. Efficient management of outbreaks can effectively avert the occurrence of explosive and  
521 rapid spread of epidemics in the future.

522 Intriguingly, many countries in Southeast Asia exhibit a cyclical trend, experiencing  
523 surges in dengue infections throughout specific periods. The apparent high prevalence of  
524 dengue in the Southeast Asia region can be partly attributed to hyperendemicity, which refers  
525 to the simultaneous circulation of all four serotypes of the virus [36]. The occurrence of  
526 recurring epidemics involves the rotation of DEN V serotypes. Empirical evidence has shown  
527 that the variation in the yearly dengue pattern is caused by the interchanging of serotypes or  
528 the displacement of serotypes [37,38]. Counterfactual study suggests that the presence of  
529 dengue hyperendemicity greatly amplifies the intensity of prior outbreaks [39]. It corresponds  
530 to this model of interaction dynamics, which elucidates the surge in the number of cases in the  
531 current outbreak and is connected to prior dengue occurrences. Furthermore, the intricate  
532 balance is influenced by vector dynamics and immunological interactions [40,41].

533

## 534 ***Limitation***

535 This study does not consider variables such as demography, population immunity, mosquito  
536 virus surveillance, or the socio-economic structure of society. Historically, there has been a  
537 lack of consistent collection of serial data on virus surveillance in mosquitoes. This study also  
538 recognizes the significance of vector control in the potential disruption of equilibrium. This  
539 study focused exclusively on dengue cases that were diagnosed and reported solely to the health  
540 district. Hence, the system's ability to accurately document the overall number of dengue cases  
541 may be compromised due to the presence of diverse dengue symptoms, resulting in instances  
542 where illnesses go unnoticed or undetected.



543

## 544 *Future research*

545 In light of the preceding findings, it is paramount to develop a certain standard of intervention  
546 index to address the inadequacy of consistency of method when assessing various  
547 interventions. It will be tremendously useful and convenient for evaluating and comparing the  
548 various measures that have been adopted in combating dengue in a temporal manner. The  
549 deployment of sticky ovitrap as a mass trapping control method under sustainable engagement  
550 circumstances could later be studied and explored with the adaptation of control protocols.  
551 Temperature is indeed an overall excellent estimator of the meteorological parameter that has  
552 a direct impact on the development of dengue cases. It is recommended to use more extensive  
553 data to look into its temporal interaction with ovitrap, sticky ovitrap findings, and progression  
554 of virus in mosquitoes.

555

## 556 *Conclusions*

557 The VECM model provides an excellent trade-off between goodness of fit and complexity in  
558 describing the variables examined. Mean absolute percentage error (MAPE), computed as  
559 2.72%, is an easy interpretation and best for describing the forecasting performance. The  
560 careful juxtaposition of the prediction values with the actual values that were observed during  
561 the first quarter of 2023 underscores the challenges relevant to a real-world phenomenon.  
562 Previous dengue occurrences predicted a surge of new dengue cases while preserving the  
563 cyclical pattern. The model additionally predicts the utility and efficacy of sticky ovitrap,  
564 thereby establishing and reinforcing its dual roles in aiding strategy. The result also reinforced  
565 the use of ovitrap as a surveillance tool and offered substantiation of the influence of

566 temperature on the progression of dengue cases. Refining these results into strategies will  
567 ultimately enhance public health responses to vector-borne diseases. The magnitude of  
568 quantified differences illustrates the intricate interactions of determinants that influence dengue  
569 transmission. Despite these limitations in modelling, the VECM is able to approximate the  
570 long-term equilibrium and short-term adjustments between the variables, which allows it to be  
571 exploited for progressively informing public health policies and strategies.

572 **Acknowledgments:** The authors are grateful for the Ministry of Health Malaysia.

### 573 **References**

- 574 1. Gubler DJ. Dengue, urbanization and globalization: the unholy trinity of the 21<sup>st</sup> Century.  
575 Trop Med Health. 2011.
- 576 2. World Health Organization. Dengue guidelines for diagnosis, treatment, prevention and  
577 control: new edition. World Health Organization. 2009.  
578 <https://apps.who.int/iris/handle/10665/44188>
- 579 3. Morrison AC et al. Defining challenges and proposing solutions for control of the virus  
580 vector aedes aegypti. PLoS Med. 2008; 5(3): e68.  
581 <https://doi.org/10.1371/journal.pmed.0050068>
- 582 4. Albuquerque D, Pinto RC, Sadahiro M. Relationship between local presence and density of  
583 aedes aegypti eggs with dengue cases: a spatial analysis approach. Trop Med Int Health. 2018;  
584 23(11):1269-1279. doi: 10.1111/tmi.13150.
- 585 5. Sánchez-Gendriz I, Fountuora G. Knowledge discovery and dengue forecasting applied in  
586 a four-year dataset collected at Natal/RN – Brazil. Environmental Science Medicine. 2021;  
587 doi:10.21203/rs.3.rs-955820/v1.

- 588 6. Sarbhan S, Lai Chee H, Lokman Hakim S. The effects of meteorological factors on dengue  
589 cases in Malaysia. *Int J Environ Res Public Health*. 2022; 19(11):  
590 6449. doi: 10.3390/ijerph19116449.
- 591 7. Seema Patil et al. Forecasting dengue hotspots associated with variation in meteorological  
592 parameters using regression and time series models. *Front Public Health Sec Digital Public*  
593 *Health*. 2021; 9. <https://doi.org/10.3389/fpubh.2021.798034>
- 594 8. Wilawan Kumharn et al. Effects of meteorological factors on dengue incidence in Bangkok  
595 city: a model for dengue prediction. *Modeling Earth Systems and Environment*. 2023; 9: 1215–  
596 1222.
- 597 9. Rohani A, Suzilah I, Malinda M, Anuar I, Topek O, Tanrang Y, et al. *Aedes* larval population  
598 dynamics and risk for dengue epidemics in Malaysia. *Trop Biomed*. 2011; 28(2): 237- 248.
- 599 10. Rohani A, Suzilah I, et al. Factors determining dengue outbreak in Malaysia. *PLoS One*.  
600 2018; 13(2): e0193326. <https://doi.org/10.1371/journal.pone.0193326>.
- 601 11. Suzilah I, Robert F, Rohani A, Wan Najdah WMA. The practicality of Malaysia dengue  
602 outbreak forecasting model as an early warning system. *Infectious Disease Modelling*. 2022;  
603 7: 510- 525.
- 604 12. Vectorborne disease annual report. Melaka Health Department. 2023.
- 605 13. Arunachalam N, Samuel PP, Hiriyan J, Gajanana A. A comparative study on sampling  
606 techniques for *aedes aegypti* (diptera: culicidae) surveillance in Madurai, South India. *Trop*  
607 *Biomed*. 1999; 16: 25-29.
- 608 14. Richards SL, Apperson CS, Ghosh SK, Cheshire HM, Zeichner BC. Spatial analysis of  
609 *aedes albopictus* (diptera: culicidae) oviposition in suburban neighborhoods of a Piedmont  
610 community in North Carolina. *J Med Entomol*. 2006; 43: 976- 989.

- 611 15. Ritchie SA, Long S, Smith G. Entomological investigations in a focus of dengue  
612 transmission in Cairns, Queensland, Australia, by using the sticky ovitraps. *J Med Entomol.*  
613 2004; 41(1): 1-4. <https://doi.org/10.1603/0022-2585-41.1.1>
- 614 16. Lütkepohl H. *New introduction to multiple time series analysis.* Berlin: Springer. 2005.
- 615 17. Wee P, Tan R. Performance of Johansen's cointegration test. In *East Asian Economic*  
616 *Issues.* 1997; 3.
- 617 18. Hyndman RJ, Koehler AB. Another look at measures of forecast accuracy. *International*  
618 *Journal of Forecasting.* 2006; 22(4): 679-688.
- 619 19. Makridakis S, Wheelwright SC, Hyndman RJ. *Forecasting: methods and applications.* John  
620 Wiley & Sons. 1998.
- 621 20. Morin CW, Comrie AC, Ernst K. Climate and dengue transmission: evidence and  
622 implications. *Environmental Health Perspectives.* 2013; 121(11-12):264-1272.
- 623 21. Alto BW, Bettinardi D. Temperature and dengue virus infection in mosquitoes: independent  
624 effects on the immature and adult stages. *Am J Trop Med Hyg.* 2013; 88 (3): 497–505. doi:  
625 10.4269/ajtmh.12-0421.
- 626 22. Delatte H, Gimonneau G, Triboire A, Fontenille D. Influence of temperature on immature  
627 development, survival, longevity, fecundity, and gonotrophic cycles of *aedes albopictus*, vector  
628 of chikungunya and dengue in the Indian Ocean. *J Med Entomol.* 2009; 46: 33–41.  
629 doi: 10.1603/033.046.0105.
- 630 23. Carrington LB, Armijos MV, Lambrechts L, Barker CM, Scott TW. Effects of fluctuating  
631 daily temperatures at critical thermal extremes on *aedes aegypti* life-history traits. *PLoS*  
632 *One.* 2013;8: e58824. doi: 10.1371/journal.pone.0058824.

- 633 24. Myer MH, Fizer CM, Mcpherson KR, Neale AC, Pilant AN, Rodriguez A, et al.  
634 Mapping *aedes aegypti* (diptera: culicidae) and *aedes albopictus* vector mosquito distribution  
635 in Brownsville, TX. *J Med Entomol.* 2020; 57 (1): 231–240. doi: 10.1093/jme/tjz132.
- 636 25. Iwamura T, Guzman-Holst A, Murray KA. Accelerating invasion potential of disease  
637 vector *Aedes aegypti* under climate change. *Nat. Commun.* 2020; 11 (1): 2130. doi:  
638 10.1038/s41467-020-16010-4.
- 639 26. Nik Muhammad Hanif NAH, Nazri Che Dom. A systematic review and meta-analysis of  
640 the effects of temperature on the development and survival of the *aedes* mosquito. *Front Public*  
641 *Health.* 2022; 10: 1074028. doi: 10.3389/fpubh.2022.1074028.
- 642 27. Liu Z, Zhang Z, Lai Z, Zhou T, Jia Z, Gu J, et al. Temperature increase enhances *Aedes*  
643 *albopictus* competence to transmit dengue virus. *Front Microbiol.* 2017; 8: 2337. doi:  
644 10.3389/fmicb.2017.02337.
- 645 28. Ciota AT, Chin PA, Ehrbar DJ, Micieli MV, et al. Differential effects of temperature and  
646 mosquito genetics determine transmissibility of arboviruses by *aedes aegypti* in Argentina. *Am*  
647 *J Trop Med Hyg.* 2018; 99(2). doi: 10.4269/ajtmh.18-0097.
- 648 29. Zhuanzhuan L, Qingxin Z et al. The effect of temperature on dengue virus transmission  
649 by *aedes* mosquitoes. *Front Cell Infect Microbiol.* 2023; 13:  
650 1242173. doi: 10.3389/fcimb.2023.1242173.
- 651 30. Zhang X, Sheng J, et al. Dengue structure differs at the temperatures of its human and  
652 mosquito hosts. *Proc Natl Acad Sci USA.* 2013; 110 (17): 6795–6799. doi:  
653 10.1073/pnas.1304300110.

- 654 31. Sharma KK, Lim XX, et al. Infectivity of dengue virus serotypes 1 and 2 is correlated with  
655 E-protein intrinsic dynamics but not to envelope conformations. *Structure*. 2019; 27 (4): 618–  
656 630.e4. doi: 10.1016/j.str.2018.12.006.
- 657 32. Shlomit Paz. Climate change: A driver of increasing vectorborne disease transmission in  
658 non-endemic areas. *PLoS Med*. 2024; 21(4):  
659 e1004382.<https://doi.org/10.1371/journal.pmed.1004382>.
- 660 33. Ali Jaffal, Johanna Fite. Current evidences of the efficacy of mosquito mass-trapping  
661 interventions to reduce aedes aegypti and aedes albopictus populations and aedes-borne virus  
662 transmission. *PLoS Negl Trop*. 2023;17(3): e0011153.  
663 <https://doi.org/10.1371/journal.pntd.0011153>.
- 664 34. Brian JJ, Scott AR. The State of the Art of Lethal Oviposition Trap-Based Mass  
665 Interventions for Arboviral Control. *Insects*. 2017; 8(5). doi:10.3390/insects8010005.
- 666 35. World Health Organization. Efficacy-testing of traps for control of aedes spp. mosquito  
667 vectors. WHO Geneva. Contract No.: WHO/CDS/NTD/VEM/2018.06. 2018.
- 668 36. Cattarino L, Rodriguez-Barraquer I, Imai N. Mapping global variation in dengue  
669 transmission intensity. *Sci Transl Med*. 2020; 12: eaax4144. doi:10.1126/scitranslmed.  
670 aax4144.
- 671 37. Rajarethinam J et al. Dengue in Singapore from 2004 to 2016: cyclical epidemic patterns  
672 dominated by serotypes 1 and 2. *Am J Trop Med Hyg*. 2018; 99: 204–210.  
673 doi:10.4269/ajtmh.17-0819.
- 674 38. Hapuarachchi HC et al. Epidemic resurgence of dengue fever in Singapore in 2013–2014:  
675 a virological and entomological perspective. *BMC Infect*. 2016; 16: 300. doi:10.1186/s12879-  
676 016-1606-z.

677 39. Lim JT et al. Hyperendemicity associated with increased dengue burden. *J R Soc Interface*.  
678 2021; 18: 20210565. <https://doi.org/10.1098/rsif.2021.0565>.

679 40. Reich NG et al. Interactions between serotypes of dengue highlight epidemiological impact  
680 of cross-immunity. *J R Soc Interface*. 2013; 10: 20130414. doi:10.1098/rsif.2013.0414.

681 41. Coudeville L, Garnett GP. Transmission dynamics of the four dengue serotypes in southern  
682 Vietnam and the potential impact of vaccination. *PLoS One*. 2012; 7: e51244.  
683 doi:10.1371/journal.pone.0051244.

684

685

686

687

688

689

690

691

692

693

694

695

696

697

698

699

700

701



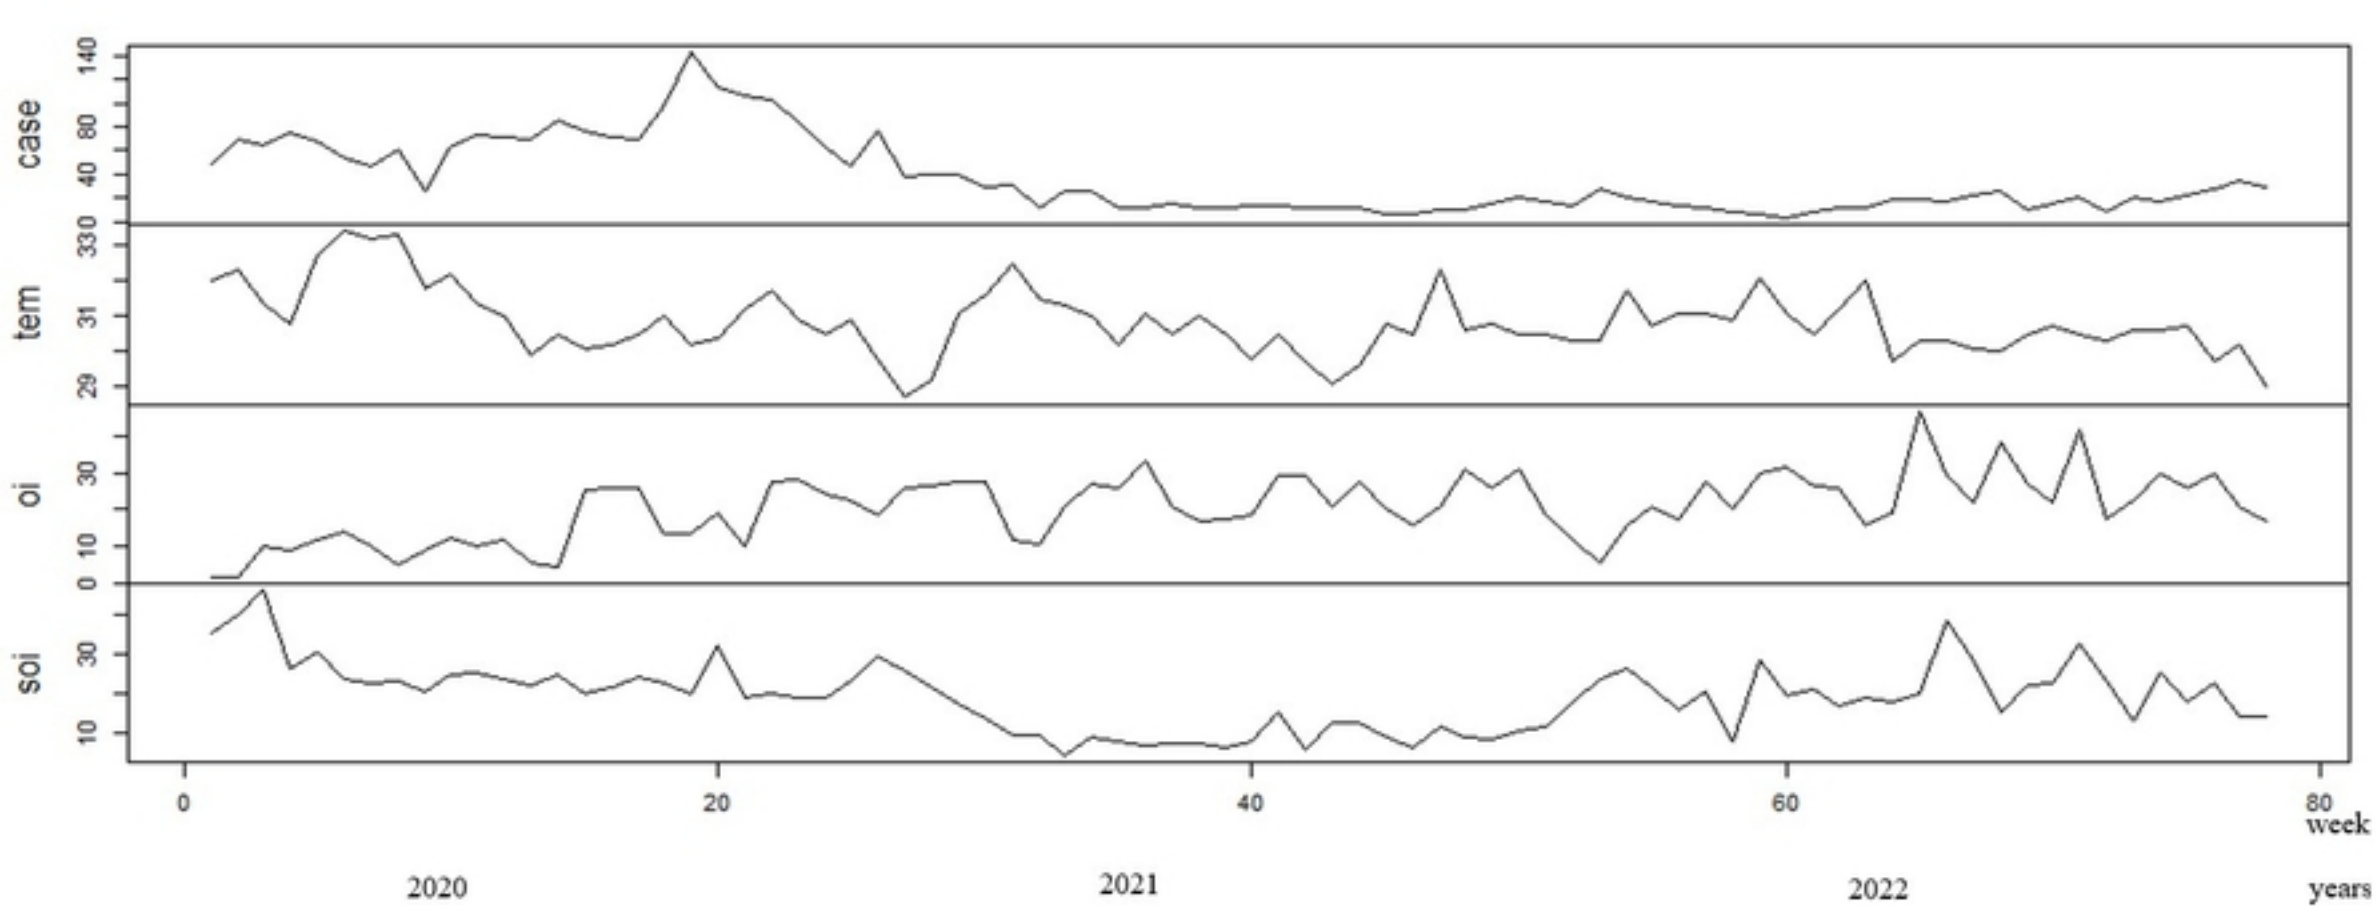

Figure

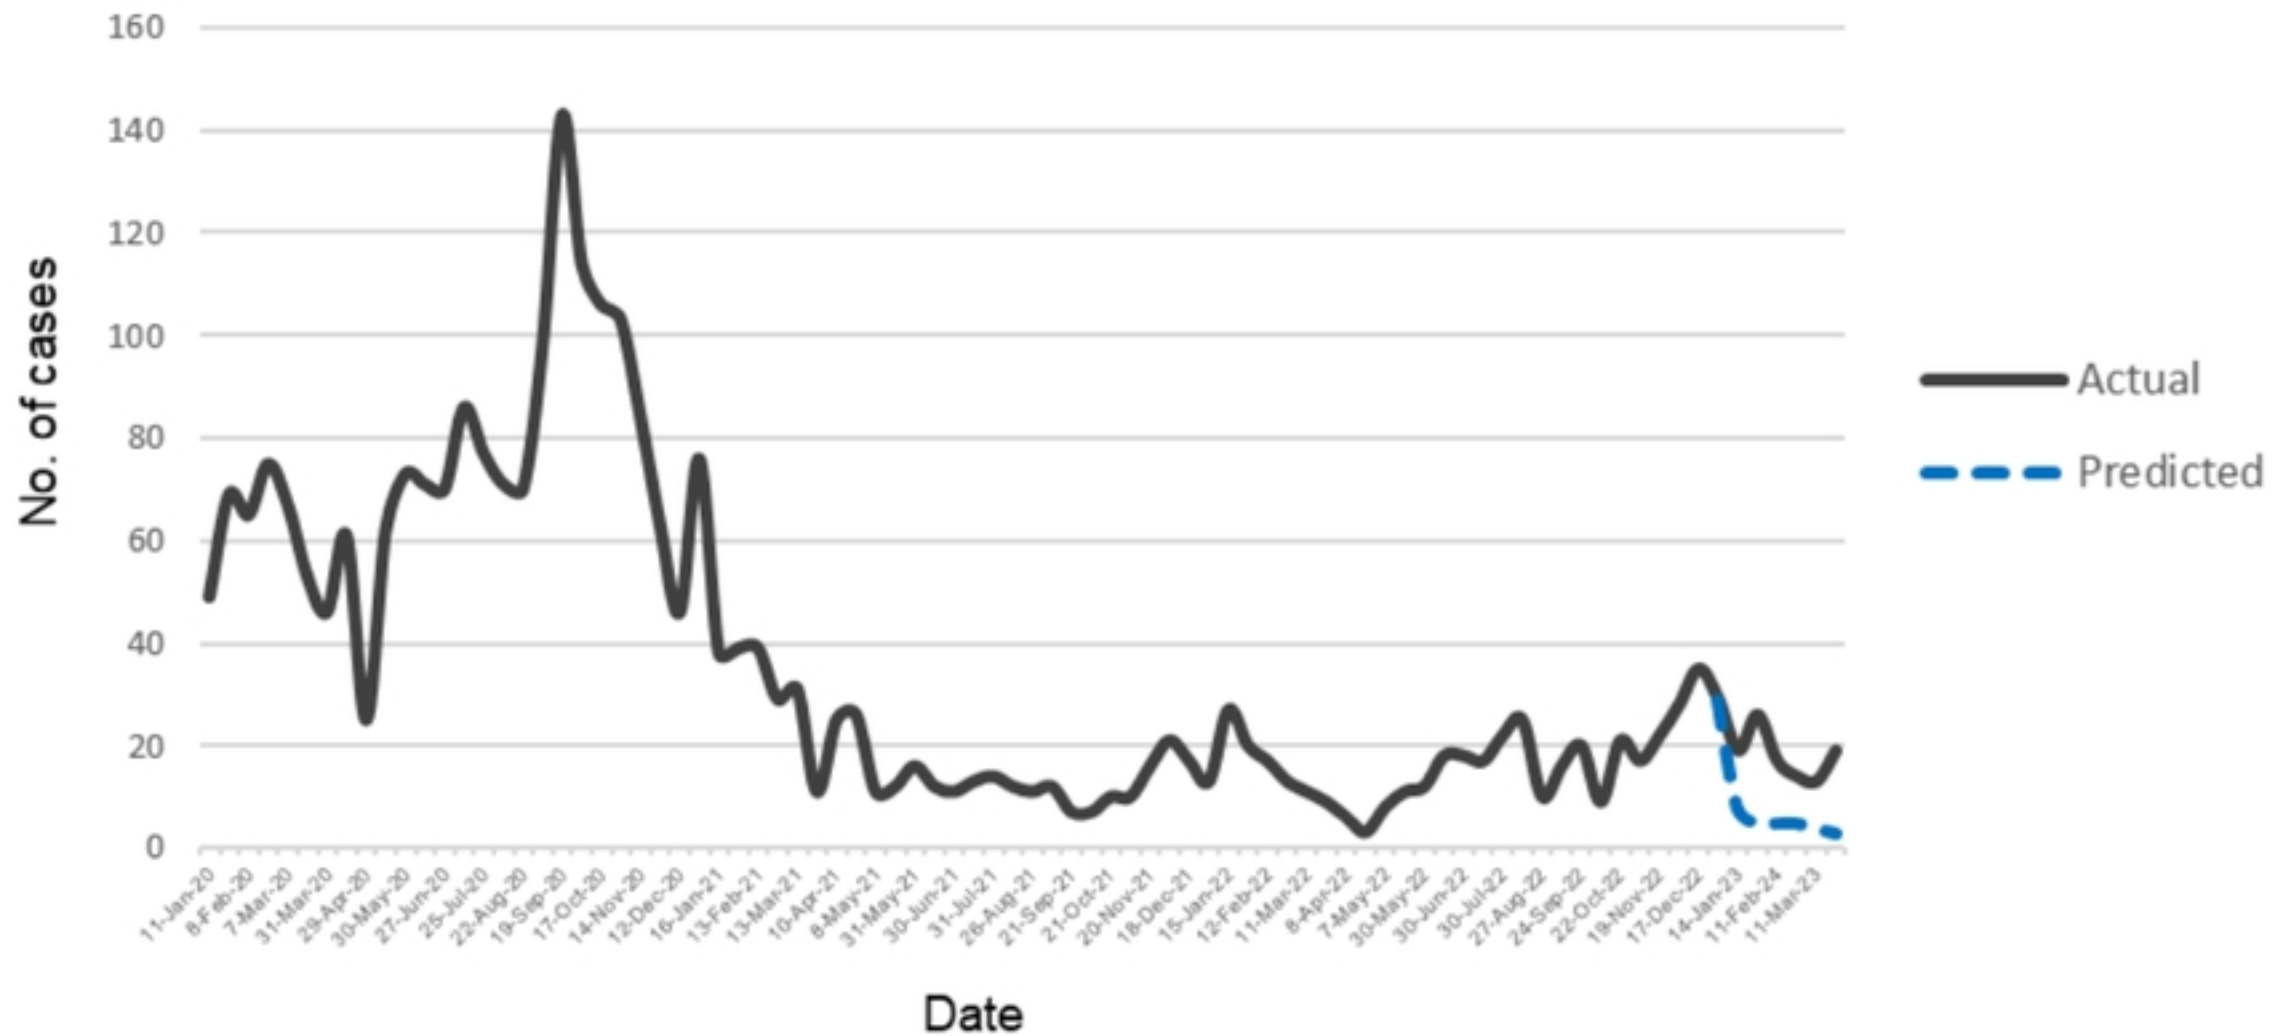

Figure
